# Supplementary material
Source: publisher site journal article supplement (https://www.dovepress.com/article/419863)
Supplement: Supplementary file 1 [file get_supplementary_file.php]

## Appendix 1: Search Strategy

| Number | Searches                                                                                                                                                                                      | Results |
|--------|-----------------------------------------------------------------------------------------------------------------------------------------------------------------------------------------------|---------|
| 1      | ophthalmic viscosurgical device/ or ([ophthalmic adj2 {viscoelastic or viscosurgical*}] or DisCoVisc or "Healon 5" or OcuSeal or DuoVisc or Provisc or Viscoat or Viskoat).mp.                | 1471    |
| 2      | exp eye surgery/ or exp cataract extraction/ or lens implantation/ or exp refractive surgery/ or exp vitreoretinal surgery/ or exp eye disease/su or anterior eye chamber/                    | 324300  |
| 3      | (viscosurgical device or OVD or OVDs or [viscoelastic adj {substance? or agent}]).mp.                                                                                                         | 3442    |
| 4      | 2 and 3 [OVD and ophthalmic surgery]                                                                                                                                                          | 1522    |
| 5      | hyaluronic acid/ or chondroitin sulfate/ or (hyaluronate or [chondroitin adj3 {sulfate or sulfuric sulphate}] or chondroitinsulph or chondroitinsulf).mp.                                     | 96736   |
| 6      | Alcon.mp.                                                                                                                                                                                     | 9620    |
| 7      | 5 and 6 [Alcon produced materials]                                                                                                                                                            | 360     |
| 8      | 4 and 7                                                                                                                                                                                       | 76      |
| 9      | 1 or 4 or 8                                                                                                                                                                                   | 2007    |
| 10     | limit 9 to English language                                                                                                                                                                   | 1801    |
| 11     | limit 10 to human                                                                                                                                                                             | 1480    |
| 12     | 11 not (editorial or letter or note or short survey or tombstone).pt.                                                                                                                         | 1310    |
| 13     | limit 12 to yr="1996 -Current"                                                                                                                                                                | 1195    |
| 14     | 13 use oemezd                                                                                                                                                                                 | 837     |
| 15     | ([ophthalmic adj2 {viscoelastic or viscosurgical*}] or DisCoVisc or "Healon 5" or OcuSeal or DuoVisc or Provisc or Viscoat or Viskoat).mp.                                                    | 1471    |
| 16     | exp Ophthalmologic Surgical Procedures/ or Refractive Surgical Procedures/ or exp Eye Diseases/su or exp Cataract Extraction/ or Lens Implantation, Intraocular/ or exp Anterior Eye Segment/ | 441305  |
| 17     | Viscosupplements/ or (viscosurgical device or OVD or OVDs or [viscoelastic adj {substance or agent}]).mp.                                                                                     | 4723    |
| 18     | 16 and 17 [OVD and ophthalmic surgery]                                                                                                                                                        | 1692    |
| 19     | hyaluronic acid/ or chondroitin sulfate/ or (hyaluronate or [chondroitin adj3 {sulfate or sulfuric sulphate}] or chondroitinsulph or chondroitinsulf).mp.                                     | 96736   |
| 20     | Alcon.mp.                                                                                                                                                                                     | 9620    |
| 21     | 19 and 20 [Alcon produced materials]                                                                                                                                                          | 360     |

|           |                                                                                                                                                                                                                                                                                                                                                                                                                            |            |
|-----------|----------------------------------------------------------------------------------------------------------------------------------------------------------------------------------------------------------------------------------------------------------------------------------------------------------------------------------------------------------------------------------------------------------------------------|------------|
| 22        | 18 and 21                                                                                                                                                                                                                                                                                                                                                                                                                  | 78         |
| 23        | 15 or 18 or 22                                                                                                                                                                                                                                                                                                                                                                                                             | 2155       |
| 24        | limit 23 to English language                                                                                                                                                                                                                                                                                                                                                                                               | 1935       |
| 25        | limit 24 to human                                                                                                                                                                                                                                                                                                                                                                                                          | 1597       |
| 26        | 25 not (address or autobiography or bibliography or biography or comment or dictionary or directory or editorial or "expression of concern" or historical article or interactive tutorial or lecture or legal case or legislation or news or newspaper article or patient education handout or personal narrative or portrait or video-audio media or webcast or [letter not (letter and randomized controlled trial)].pt. | 1435       |
| 27        | limit 26 to yr="1996 -Current"                                                                                                                                                                                                                                                                                                                                                                                             | 1309       |
| 28        | 27 use ppez                                                                                                                                                                                                                                                                                                                                                                                                                | 441        |
| 29        | 14 or 28                                                                                                                                                                                                                                                                                                                                                                                                                   | 1278       |
| <b>30</b> | <b>remove duplicates from 29</b>                                                                                                                                                                                                                                                                                                                                                                                           | <b>966</b> |

\* The asterisk (\*) symbol in PubMed searches serves as a truncation symbol, allowing for searching multiple variations of a word by including any ending of the truncated word.

## Appendix 2

### Equation 1. Calculation of percentage change for outcome measures.

$$\% \text{ change} = 100 \times \frac{\text{preoperative} - \text{postoperative}}{\text{preoperative}}$$

### Equation 2. The Delta method derivation to compute standard deviation of percent change.

$$\text{Var}(g(t)) \approx \sum_{i=1}^k g'_i(\theta) g'_j(\theta) \text{Cov}(t_i, t_j)$$

$$\frac{\partial}{\partial \mu_X} g(\mu_X, \mu_Y) = -\frac{\mu_Y}{\mu_X^2}$$

$$\frac{\partial}{\partial \mu_Y} g(\mu_X, \mu_Y) = \frac{1}{\mu_X}$$

$$\text{Var}\left(\frac{Y}{X}\right) \approx \left(\frac{\mu_Y^2}{\mu_X^4}\right) \text{Var}(X) + \left(\frac{1}{\mu_X^2}\right) \text{Var}(Y) - 2 \cdot \left(\frac{\mu_Y}{\mu_X^3}\right) \text{Cov}(X, Y)$$

$$SE\left(100 \cdot \left(Y - \frac{X}{X}\right)\right) \approx 100 \cdot \sqrt{\frac{\text{Var}(Y)\mu_X^2 - 2 \cdot \text{Cov}(X, Y)\mu_X\mu_Y + \text{Var}(X)\mu_Y^2}{\mu_X^4}}$$
